# Supplementary material for: Effect of Low Water Availability on Seed Yield and Seed Quality of Basil (Ocimum basilicum)
Source: MDPI journal article supplement (doi:10.3390/plants12051094), 2023-03-01
Supplement: s1 [file s1]

## Supplementary material: Tables

Table S1. Main effect (mean  $\pm$  common SE and median values) of the two years of experimentation on seed yield and thousand seed weight.

| Year  |        | Seed Yield (gm <sup>-2</sup> ) | Thousand seed weight (g) |
|-------|--------|--------------------------------|--------------------------|
| 2015  | Mean   | 116.08 $\pm$ 5.13              | 1.00 $\pm$ 0.033         |
|       | Median | 91.00                          | 0.99                     |
| 2016  | Mean   | 105.42 $\pm$ 5.13              | 1.04 $\pm$ 0.033         |
|       | Median | 76.00                          | 1.12                     |
| Total | Mean   | 110.75 $\pm$ 3.63              | 1.02 $\pm$ 0.023         |
|       | Median | 82.00                          | 1.06                     |

Table S2. Main effect (mean  $\pm$  common SE and median values) of the three irrigation treatments on seed yield and thousand seed weight.

| Irrigation |        | Seed Yield (gm <sup>-2</sup> ) | Thousand seed weight (g) |
|------------|--------|--------------------------------|--------------------------|
| d40        | Mean   | 96.35 $\pm$ 6.29               | 0.99 $\pm$ 0.040         |
|            | Median | 76.00                          | 1.06                     |
| d70        | Mean   | 105.30 $\pm$ 6.29              | 1.02 $\pm$ 0.040         |
|            | Median | 83.50                          | 0.99                     |
| d100       | Mean   | 130.60 $\pm$ 6.29              | 1.05 $\pm$ 0.040         |
|            | Median | 89.00                          | 1.08                     |

Table S3. Main effect (mean  $\pm$  common SE and median values) of the basil cultivars on seed yield and thousand seed weight.

| Cultivar  |        | Seed Yield (gm <sup>-2</sup> ) | Thousand seed weight (g) |
|-----------|--------|--------------------------------|--------------------------|
| Mrs Burns | Mean   | 184.92 $\pm$ 8.12              | 1.20 $\pm$ 0.05          |
|           | Median | 188.50                         | 1.24                     |
| Cinnamon  | Mean   | 172.38 $\pm$ 8.12              | 1.09 $\pm$ 0.05          |
|           | Median | 183.00                         | 1.14                     |
| Sweet     | Mean   | 64.17 $\pm$ 8.12               | 1.14 $\pm$ 0.05          |
|           | Median | 63.50                          | 1.10                     |
| Red Rubin | Mean   | 59.38 $\pm$ 8.12               | .80 $\pm$ 0.05           |
|           | Median | 59.00                          | .86                      |
| Thai      | Mean   | 72.92 $\pm$ 8.12               | .88 $\pm$ 0.05           |
|           | Median | 66.00                          | .83                      |

Table S4. Main effect (mean  $\pm$  common SE and median values) of the two years of experimentation on seed germination, length of shoot, length of root, and seed vigor.

| Year  |        | Seed germination (%) | Length of shoot (cm) | Length of root (cm) | Seed vigor       |
|-------|--------|----------------------|----------------------|---------------------|------------------|
| 2015  | Mean   | 51.86 $\pm$ 0.62     | 2.50 $\pm$ 0.02      | 1.73 $\pm$ 0.02     | 0.73 $\pm$ 0.042 |
|       | Median | 50.00                | 2.43                 | 1.56                | 0.59             |
| 2016  | Mean   | 46.90 $\pm$ 0.62     | 1.82 $\pm$ 0.02      | 1.47 $\pm$ 0.02     | 1.37 $\pm$ 0.042 |
|       | Median | 48.33                | 1.99                 | 1.40                | 0.78             |
| Total | Mean   | 49.38 $\pm$ 0.44     | 2.16 $\pm$ 0.01      | 1.60 $\pm$ 0.015    | 1.05 $\pm$ 0.03  |
|       | Median | 50.00                | 2.25                 | 1.43                | 0.66             |

Table S5. Main effect (mean  $\pm$  common SE and median values) of the three irrigation treatments on seed germination, length of shoot, length of root and seed vigor.

| Irrigation       |        | Seed germination (%) | Length of shoot (cm) | Length of root (cm) | Seed vigor      |
|------------------|--------|----------------------|----------------------|---------------------|-----------------|
| d <sub>40</sub>  | Mean   | 55.06 $\pm$ 0.75     | 2.20 $\pm$ 0.022     | 1.65 $\pm$ 0.03     | 1.08 $\pm$ 0.05 |
|                  | Median | 55.84                | 2.26                 | 1.49                | 0.68            |
| d <sub>70</sub>  | Mean   | 47.47 $\pm$ 0.75     | 2.13 $\pm$ 0.022     | 1.56 $\pm$ 0.03     | 1.01 $\pm$ 0.05 |
|                  | Median | 46.67                | 2.26                 | 1.45                | 0.68            |
| d <sub>100</sub> | Mean   | 45.60 $\pm$ 0.75     | 2.15 $\pm$ 0.022     | 1.59 $\pm$ 0.03     | 1.07 $\pm$ 0.05 |
|                  | Median | 45.84                | 2.21                 | 1.39                | 0.63            |

Table S6. Main effect (mean  $\pm$  common SE and median values) of the five basil cultivars on seed germination, length of shoot, length of root and seed vigor.

| Cultivar  |        | Seed germination (%) | Length of shoot (cm) | Length of root (cm) | Seed vigor       |
|-----------|--------|----------------------|----------------------|---------------------|------------------|
| Mrs Burns | Mean   | 66.20 $\pm$ 0.97     | 2.06 $\pm$ 0.03      | 1.99 $\pm$ 0.034    | 1.58 $\pm$ 0.066 |
|           | Median | 74.17                | 2.25                 | 2.00                | 0.90             |
| Cinnamon  | Mean   | 51.16 $\pm$ 0.97     | 2.31 $\pm$ 0.03      | 1.35 $\pm$ 0.034    | 0.66 $\pm$ 0.066 |
|           | Median | 50.00                | 2.39                 | 1.25                | 0.50             |
| Sweet     | Mean   | 51.61 $\pm$ 0.97     | 2.81 $\pm$ 0.03      | 2.05 $\pm$ 0.034    | 0.87 $\pm$ 0.066 |
|           | Median | 53.33                | 2.92                 | 1.98                | 0.67             |
| Red Rubin | Mean   | 36.81 $\pm$ 0.97     | 1.44 $\pm$ 0.03      | 0.92 $\pm$ 0.034    | 0.91 $\pm$ 0.066 |
|           | Median | 36.67                | 1.60                 | 0.92                | 0.63             |
| Thai      | Mean   | 41.11 $\pm$ 0.97     | 2.17 $\pm$ 0.03      | 1.68 $\pm$ 0.034    | 1.24 $\pm$ 0.066 |
|           | Median | 45.00                | 2.38                 | 1.55                | 0.64             |

Table S7. Main effect (mean  $\pm$  common SE and median values) of the four PEG concentrations on seed germination, length of shoot, length of root and seed vigor.

| PEG % |        | Seed germination (%) | Length of shoot (cm) | Length of root (cm) | Seed vigor      |
|-------|--------|----------------------|----------------------|---------------------|-----------------|
| S0    | Mean   | 55.32 $\pm$ 0.87     | 2.86 $\pm$ 0.025     | 1.38 $\pm$ 0.03     | 0.48 $\pm$ 0.06 |
|       | Median | 53.33                | 2.91                 | 1.39                | 0.49            |
| S5    | Mean   | 53.19 $\pm$ 0.87     | 2.53 $\pm$ 0.025     | 1.52 $\pm$ 0.03     | 0.60 $\pm$ 0.06 |
|       | Median | 51.67                | 2.50                 | 1.31                | 0.57            |
| S10   | Mean   | 50.41 $\pm$ 0.87     | 2.05 $\pm$ 0.025     | 1.72 $\pm$ 0.03     | 0.90 $\pm$ 0.06 |
|       | Median | 48.33                | 2.13                 | 1.68                | 0.78            |
| S15   | Mean   | 38.60 $\pm$ 0.87     | 1.20 $\pm$ 0.025     | 1.78 $\pm$ 0.03     | 2.23 $\pm$ 0.06 |
|       | Median | 37.50                | 1.15                 | 1.46                | 1.57            |
